# Supplementary material for: Proximity to Natural Gas Wells and Reported Health Status: Results of a Household Survey in Washington County, Pennsylvania
Source: PubMed Central journal article supplement (PMC4286272; doi:10.1289/ehp.1307732), 2014-09-10
Supplement: ehp.1307732.s001.508.pdf [file ehp.1307732.s001.508.pdf]

**Supplemental Material**

**Proximity to Natural Gas Wells and Reported Health Status:  
Results of a Household Survey in Washington County, Pennsylvania**

Peter M. Rabinowitz, Ilya B. Slizovskiy, Vanessa Lamers, Sally J. Trufan, Theodore R. Holford,  
James D. Dziura, Peter N. Peduzzi, Michael J. Kane, John S. Reif, Theresa R. Weiss, and  
Meredith H. Stowe

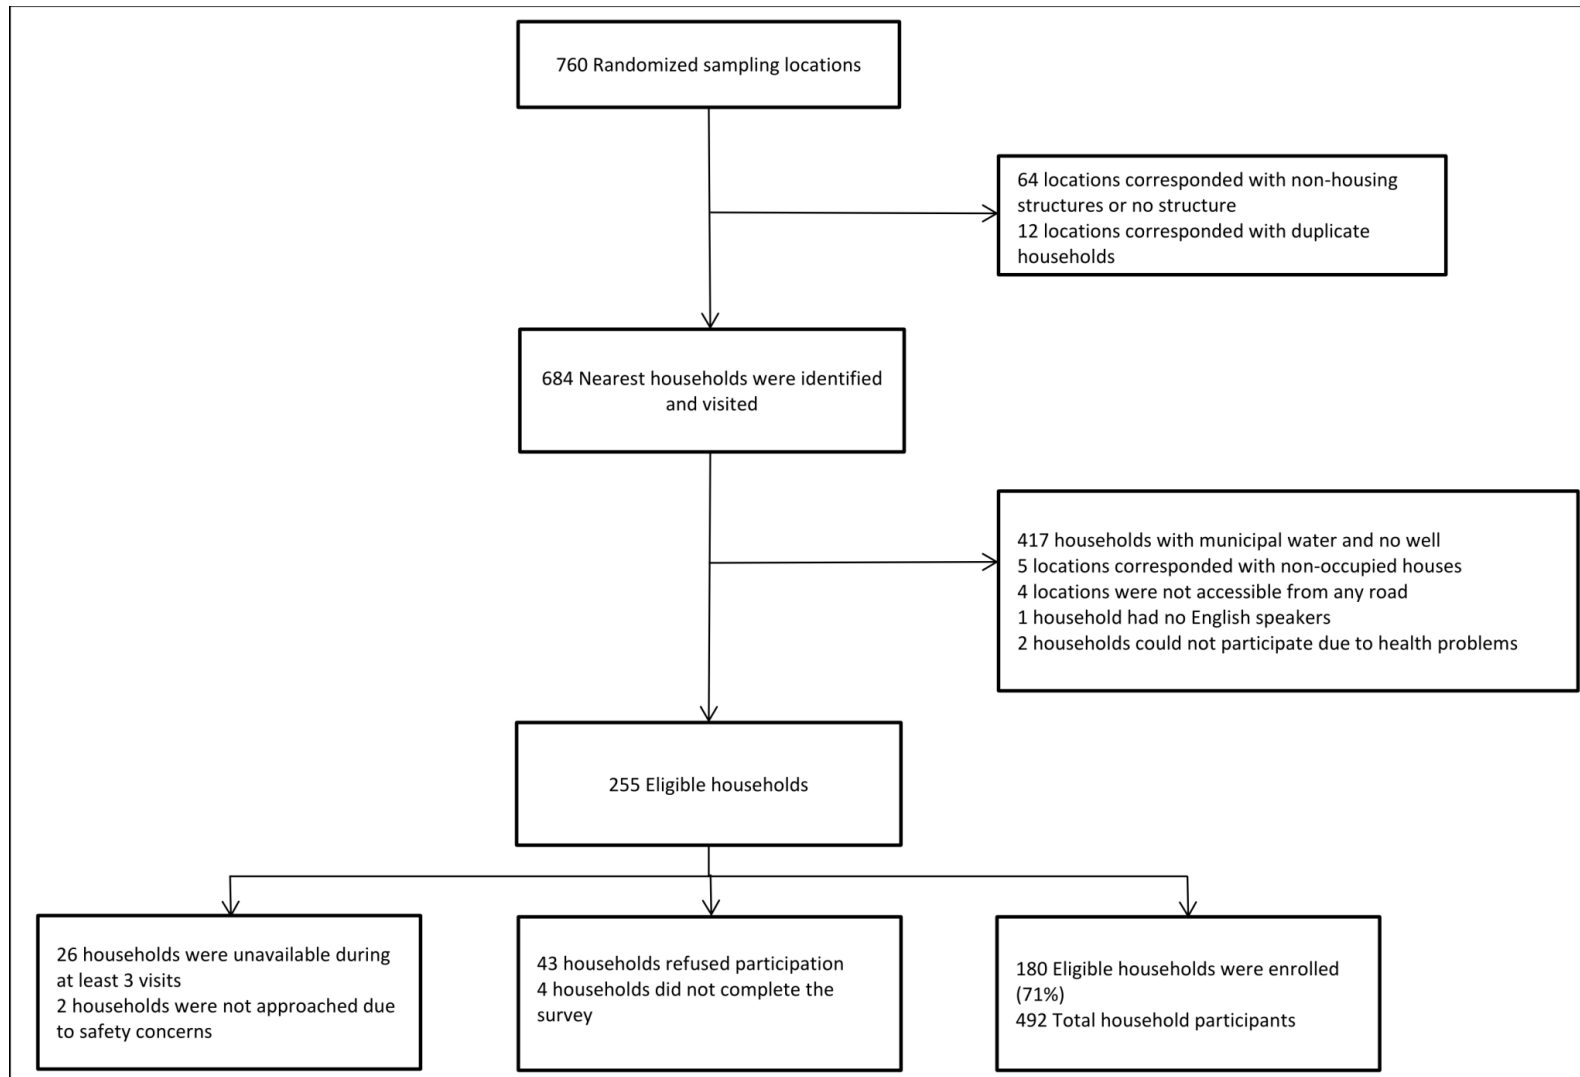

**Figure S1.** Screening, Enrollment, and Survey

From the original 760 random points geospatially identified, 417 house locations were determined to have municipal water supply and no well; 12 others were not eligible. Forty-seven of the remaining 255 eligible households refused to complete the survey; at 26 houses respondents were not available at multiple follow-up visits; 2 were not approached for safety reasons. At the remaining 180 households (71% of the 255 eligible households), an adult respondent agreed to complete the survey covering the health status of the 492 individuals living in these households.

## Supplemental Material: Questionnaire

### Examples of questions asked on the survey and included in analysis or demographic tables

#### Length of residence

How long have you (or anyone in the household) lived at this residence? \_\_\_\_\_ years      77 RF 99 DK

#### Demographics

I would like to ask about each member of your household, but please don't give me any names – just first initial.

Let's start with you.

| a.Initials | b.Gender (M or F) | c.Age | d.Education (highest grade completed) | Current job: e. type of work f. job title |
|------------|-------------------|-------|---------------------------------------|-------------------------------------------|
| 1          |                   |       |                                       |                                           |
| 2          |                   |       |                                       |                                           |
| 3<br>..... |                   |       |                                       |                                           |

#### Smoking

Does anyone in this household smoke regularly inside the house?    1 YES      2 NO      7 RF      9 DK

#### Biometrics

What is your height? \_\_\_\_\_ inches

What is your weight? \_\_\_\_\_ pounds

## Personal Health Symptoms

Have you or anyone in the household had any of the following health conditions in the past year?

| CONDITION                                                                                                                                                                    | a. Have you had?<br>1Yes 2No 7RF 9DK | b. INITIALS OF<br>anyone else? |
|------------------------------------------------------------------------------------------------------------------------------------------------------------------------------|--------------------------------------|--------------------------------|
| <b>RESPIRATORY ALLERGY/ENT:</b>                                                                                                                                              |                                      |                                |
| 1 Asthma/COPD                                                                                                                                                                |                                      |                                |
| 2 Allergies/Sinus problems                                                                                                                                                   |                                      |                                |
| 3 Metallic taste in the mouth                                                                                                                                                |                                      |                                |
| 4 Chronic bronchitis                                                                                                                                                         |                                      |                                |
| 5 Chest Wheezing or whistling                                                                                                                                                |                                      |                                |
| 6 Shortness of breath                                                                                                                                                        |                                      |                                |
| 7 Chest tightness lasting for $\geq 30$ min                                                                                                                                  |                                      |                                |
| 8 Cough/sore throat not caused by a cold lasting for $\geq 14$ days                                                                                                          |                                      |                                |
| 9 Frequent itchy or irritated eyes                                                                                                                                           |                                      |                                |
| 10 Frequent nose bleeds                                                                                                                                                      |                                      |                                |
| 11 Stuffy nose/rhinitis                                                                                                                                                      |                                      |                                |
| 12 Hearing loss or dysfunction                                                                                                                                               |                                      |                                |
| 13 Tinnitus/ringing in the ears                                                                                                                                              |                                      |                                |
| <b>DERMAL:</b>                                                                                                                                                               |                                      |                                |
| 14 Rashes or skin problems                                                                                                                                                   |                                      |                                |
| 15 Dermatitis                                                                                                                                                                |                                      |                                |
| 16 Skin irritation (over areas of the body that stayed for 3 days or greater than <b>does not</b> include measles, chicken pox, poison ivy/oak, bites, or allergic reaction) |                                      |                                |
| 17 Burning skin                                                                                                                                                              |                                      |                                |
| 18 Itching                                                                                                                                                                   |                                      |                                |
| 19 Hair loss                                                                                                                                                                 |                                      |                                |
| <b>CARDIAC:</b>                                                                                                                                                              |                                      |                                |
| 20 High blood pressure                                                                                                                                                       |                                      |                                |
| 21 Chest pain                                                                                                                                                                |                                      |                                |
| 22 Heart palpitations                                                                                                                                                        |                                      |                                |
| 23 Ankle swelling                                                                                                                                                            |                                      |                                |
| <b>MUSCULOSKELETAL:</b>                                                                                                                                                      |                                      |                                |
| 24 Muscle weakness/or pain                                                                                                                                                   |                                      |                                |
| 25 Joint pain, aching, or stiffness                                                                                                                                          |                                      |                                |
| <b>NEUROLOGIC:</b>                                                                                                                                                           |                                      |                                |
| 26 Neurologic problems                                                                                                                                                       |                                      |                                |
| 27 Severe headache or migraine                                                                                                                                               |                                      |                                |
| 28 Dizziness/balance problems                                                                                                                                                |                                      |                                |
| 29 Depression                                                                                                                                                                |                                      |                                |
| 30 Difficulty concentrating/remembering                                                                                                                                      |                                      |                                |
| 31 Regular difficulty sleeping and/or insomnia                                                                                                                               |                                      |                                |
| 32 Anxiety/nervousness                                                                                                                                                       |                                      |                                |
| 33 Seizures                                                                                                                                                                  |                                      |                                |

| <b>CONDITION</b>                                                                                   | <b>a. Have you had?<br/>1Yes 2No 7RF 9DK</b> | <b>b. INITIALS OF<br/>anyone else?</b> |
|----------------------------------------------------------------------------------------------------|----------------------------------------------|----------------------------------------|
| 34 Substance abuse (other than alcohol and tobacco)?                                               |                                              |                                        |
| 35 Excessive alcohol problems?                                                                     |                                              |                                        |
| <b>GI/LIVER:</b>                                                                                   |                                              |                                        |
| 36 Stomach problems/ulcers                                                                         |                                              |                                        |
| 37 Any kind of liver condition                                                                     |                                              |                                        |
| 38 Nausea/vomiting                                                                                 |                                              |                                        |
| 39 Abdominal pain                                                                                  |                                              |                                        |
| 40 Diarrhea                                                                                        |                                              |                                        |
| 41 Bleeding                                                                                        |                                              |                                        |
| <b>KIDNEY:</b>                                                                                     |                                              |                                        |
| 42 Kidney disease or problems                                                                      |                                              |                                        |
| 43 Weak or failing kidney(s) (excluding kidney stones, bladder infections, or incontinence)        |                                              |                                        |
| <b>REPRODUCTIVE:</b>                                                                               |                                              |                                        |
| 44 Infertility                                                                                     |                                              |                                        |
| 45 Birth defects                                                                                   |                                              |                                        |
| 46 Unusual vaginal bleeding [heavy bleeding, bothersome cramping, or pre-menstrual syndrome (PMS)] |                                              |                                        |
| 47 Miscarriage/still birth                                                                         |                                              |                                        |
| <b>ENDOCRINE:</b>                                                                                  |                                              |                                        |
| 48 Weight loss or gain                                                                             |                                              |                                        |
| 49 Thyroid problems                                                                                |                                              |                                        |
| <b>BLOOD:</b>                                                                                      |                                              |                                        |
| 50 Leukemia/lymphoma                                                                               |                                              |                                        |
| 51 Anemia                                                                                          |                                              |                                        |
| 52 Swollen glands                                                                                  |                                              |                                        |
| 53 Unusual bleeding                                                                                |                                              |                                        |
| <b>OTHER:</b>                                                                                      |                                              |                                        |
| 54 Fatigue or lack of energy for $\geq 3$ days                                                     |                                              |                                        |
| 55 Other health problems: _____                                                                    |                                              |                                        |

**Environmental Quality**

For these questions, there is no right or wrong answer.

For each of the following, please choose the answer on side 1 of the blue card that best describes how **satisfied** you are with that area of your personal life or your community/neighborhood. [Very dissatisfied, moderately dissatisfied, slightly dissatisfied, slightly satisfied, moderately satisfied, very satisfied]

1. How *satisfied* are you with:

|                                           |  |
|-------------------------------------------|--|
| a. Safe areas for walking/jogging/biking? |  |
| b. Air quality/pollution?                 |  |
| c. Water quality/pollution?               |  |
| d. Land or soil quality/pollution?        |  |
| e. Neighborhood level of noise?           |  |
| f. Environmental odor(s)?                 |  |
| g. Neighborhood road use and traffic?     |  |

**Residential Environment**

Do you have any pets?    1 YES    2 NO    7 RF    9 DK

Do you have any farm animals?    1 YES    2 NO    7 RF    9 DK

Are you aware of any environmental health risks near your residence?    1 YES    2 NO    7 RF    9 DK

**Household Water**

What is the **main** source of drinking-water for members of your household?

- 1 PUBLIC TAP
- 2 WELL, UNSPECIFIED
  - 2a DRILLED WELL
  - 2b PROTECTED DUG WELL
  - 2c UNPROTECTED DUG WELL
- 3 SPRING
- 4 BOTTLED WATER [a. date started? \_\_\_\_\_]
- 5 TANK/CISTERN [a. date started? \_\_\_\_\_]
- 6 WATER BUFFALO [a. date started? \_\_\_\_\_]
- 7 RF
- 8 OTHER: \_\_\_\_\_
- 9 DK

What is the **main** source of water used by your household for other purposes, such as laundry, hand-washing, and showering?

- 1 PUBLIC TAP
- 2 WELL, UNSPECIFIED
  - 2a DRILLED WELL
  - 2b PROTECTED DUG WELL
  - 2c UNPROTECTED DUG WELL
- 3 SPRING
- 4 BOTTLED WATER [a.date started? \_\_\_\_\_]
- 5 TANK/CISTERN [a.date started? \_\_\_\_\_]
- 6 WATER BUFFALO [a.date started? \_\_\_\_\_]
- 7 RF
- 8 OTHER: \_\_\_\_\_
- 9 DK

Does the taste or odor of your well water prevent you or members of your household from drinking, cooking, bathing (etc.), or otherwise using the water that is piped to your premises?

1 YES            2 NO            3 SOMETIMES            7 RF            9 DK

Does your well water have an unnatural color or appearance?

1 YES            2 NO            3 SOMETIMES            7 RF            9 DK

Which racial or ethnic group do you most identify with?

1 American Indian or Alaskan Native

2 Asian

3 Black or African American

4 Native Hawaiian or Pacific Islander

5 Hispanic/Latino

6 Caucasian/European descent/White

8 Other: \_\_\_\_\_

7 RF

9 DK\_\_
